# Supplementary material for: Plasma ceramide levels are altered in low and normal birth weight men in response to short-term high-fat overfeeding
Source: PubMed Central journal article supplement (PMC5823847; doi:10.1038/s41598-018-21419-5), 2018-02-22
Supplement: 41598_2018_21419_MOESM1_ESM.pdf [file 41598_2018_21419_MOESM1_ESM.pdf]

# **SUPPLEMENTARY INFORMATION**

*22 December 2017*

## **TITLE**

Plasma ceramide levels are altered in low and normal birth weight men in response to short-term high-fat overfeeding.

## **AUTHORS**

Amalie Ribel-Madsen<sup>\* 1,2</sup>, Rasmus Ribel-Madsen<sup>2,3</sup>, Kristian Fog Nielsen<sup>1</sup>, Susanne Brix<sup>1</sup>, Allan A. Vaag<sup>2</sup>, and Charlotte Brøns<sup>2</sup>.

## **AUTHOR AFFILIATIONS**

<sup>1</sup>Department of Biotechnology and Biomedicine, Technical University of Denmark, Kongens Lyngby, Denmark, <sup>2</sup>Department of Endocrinology, Diabetes and Metabolism, Copenhagen University Hospital, Copenhagen, Denmark, <sup>3</sup>Danish Diabetes Academy, Odense, Denmark.

## **CORRESPONDING AUTHOR**

Amalie Ribel-Madsen, Department of Biotechnology and Biomedicine, Technical University of Denmark, Søltofts Plads, DK-2800 Kongens Lyngby, Denmark, Telephone number: +45 45252744, Fax number: +45 45886307, E-mail address: amari@bio.dtu.dk.

**Table S1: Protein, carbohydrate, and fat contents of the control (C) and high-fat, high-calorie (O) diets.**

|                             | C               |                     | O               |                     | O/C              |                      |
|-----------------------------|-----------------|---------------------|-----------------|---------------------|------------------|----------------------|
|                             | Total<br>(Mean) | Per 100 g<br>(Mean) | Total<br>(Mean) | Per 100 g<br>(Mean) | Total<br>(Ratio) | Per 100 g<br>(Ratio) |
| <b>Energy (kJ)</b>          |                 |                     |                 |                     |                  |                      |
| Total                       | 9664            | 698                 | 14848           | 1135                | 1.54             | 1.63                 |
| <b>Energy (E%)</b>          |                 |                     |                 |                     |                  |                      |
| Protein                     | 15              | 15                  | 8               | 8                   | 0.53             | 0.53                 |
| Carbohydrate                | 49              | 49                  | 33              | 33                  | 0.67             | 0.67                 |
| Fat                         | 35              | 35                  | 60              | 60                  | 1.71             | 1.71                 |
| <b>Energy (g)</b>           |                 |                     |                 |                     |                  |                      |
| Protein                     | 88              | 6.4                 | 67.1            | 5.1                 | 0.76             | 0.80                 |
| Carbohydrate                | 266.7           | 19.2                | 277.6           | 21.2                | 1.04             | 1.10                 |
| Fat                         | 92.1            | 6.6                 | 239             | 18.3                | 2.60             | 2.77                 |
| <b>Fat (g)</b>              |                 |                     |                 |                     |                  |                      |
| Saturated fatty acids       | 35.6            | 2.6                 | 109.8           | 8.4                 | 3.08             | 3.23                 |
| Monounsaturated fatty acids | 31.5            | 2.3                 | 85.4            | 6.5                 | 2.71             | 2.83                 |
| Polyunsaturated fatty acids | 8.6             | 0.6                 | 28.5            | 2.2                 | 3.31             | 3.67                 |
| n-3 fatty acids             | 0.9             | 0.1                 | 5.8             | 0.4                 | 6.44             | 4.00                 |
| n-6 fatty acids             | 7.2             | 0.5                 | 21.8            | 1.7                 | 3.03             | 3.40                 |

**Table S2: Ceramides searched in the plasma samples and mass to charge ratios (m/z-values) of their respective [M+H]<sup>+</sup>-ions, [M+H-H<sub>2</sub>O]<sup>+</sup>-fragment ions, and sphingoid base moiety fragment ions.** Ceramide position isomers are listed in the same rows according to the total number of double bonds in the structures with indication in parentheses of m/z-values of the [M+H]<sup>+</sup>-ion (quantifier ion) and [M+H-H<sub>2</sub>O]<sup>+</sup>-fragment ion (qualifier 1 ion). d18:0-, d18:1-, and d18:2- position isomers have constant m/z-values of the sphingoid base moiety fragment ion (qualifier 2 ion) of 266.2842, 264.2686, or 262.2529 Da, respectively, and variable m/z-values of the [M+H]<sup>+</sup>-ion and [M+H-H<sub>2</sub>O]<sup>+</sup>-fragment ion dependent on the acyl group in the structures. Ceramides detected in the plasma samples are marked in bold.

|                                                 | d18:0- species                                                                                                                              | d18:1- species                                                                                                                              | d18:2- species                                                                                                                              |
|-------------------------------------------------|---------------------------------------------------------------------------------------------------------------------------------------------|---------------------------------------------------------------------------------------------------------------------------------------------|---------------------------------------------------------------------------------------------------------------------------------------------|
| <b>Ceramides</b>                                | <b>Quantifier ion: [M+H]<sup>+</sup></b><br><b>Qualifier 1 ion: [M+H-H<sub>2</sub>O]<sup>+</sup></b><br><b>Qualifier 2 ion: 266.2842 Da</b> | <b>Quantifier ion: [M+H]<sup>+</sup></b><br><b>Qualifier 1 ion: [M+H-H<sub>2</sub>O]<sup>+</sup></b><br><b>Qualifier 2 ion: 264.2686 Da</b> | <b>Quantifier ion: [M+H]<sup>+</sup></b><br><b>Qualifier 1 ion: [M+H-H<sub>2</sub>O]<sup>+</sup></b><br><b>Qualifier 2 ion: 262.2529 Da</b> |
| (Formula)                                       | (Da)                                                                                                                                        | (Da)                                                                                                                                        | (Da)                                                                                                                                        |
| <b>Double bonds</b>                             |                                                                                                                                             |                                                                                                                                             |                                                                                                                                             |
| <b>0</b>                                        |                                                                                                                                             |                                                                                                                                             |                                                                                                                                             |
| C <sub>32</sub> H <sub>65</sub> NO <sub>3</sub> | d18:0-14:0 (512.5038, 494.4932)                                                                                                             | -                                                                                                                                           | -                                                                                                                                           |
| C <sub>33</sub> H <sub>67</sub> NO <sub>3</sub> | d18:0-15:0 (526.5194, 508.5088)                                                                                                             | -                                                                                                                                           | -                                                                                                                                           |
| C <sub>34</sub> H <sub>69</sub> NO <sub>3</sub> | <b>d18:0-16:0</b> (540.5351, 522.5245)                                                                                                      | -                                                                                                                                           | -                                                                                                                                           |
| C <sub>35</sub> H <sub>71</sub> NO <sub>3</sub> | d18:0-17:0 (554.5507, 536.5401)                                                                                                             | -                                                                                                                                           | -                                                                                                                                           |
| C <sub>36</sub> H <sub>73</sub> NO <sub>3</sub> | d18:0-18:0 (568.5664, 550.5558)                                                                                                             | -                                                                                                                                           | -                                                                                                                                           |
| C <sub>37</sub> H <sub>75</sub> NO <sub>3</sub> | d18:0-19:0 (582.5820, 564.5714)                                                                                                             | -                                                                                                                                           | -                                                                                                                                           |
| C <sub>38</sub> H <sub>77</sub> NO <sub>3</sub> | d18:0-20:0 (596.5977, 578.5871)                                                                                                             | -                                                                                                                                           | -                                                                                                                                           |
| C <sub>39</sub> H <sub>79</sub> NO <sub>3</sub> | <b>d18:0-21:0</b> (610.6133, 592.6027)                                                                                                      | -                                                                                                                                           | -                                                                                                                                           |
| C <sub>40</sub> H <sub>81</sub> NO <sub>3</sub> | <b>d18:0-22:0</b> (624.6290, 606.6184)                                                                                                      | -                                                                                                                                           | -                                                                                                                                           |
| C <sub>41</sub> H <sub>83</sub> NO <sub>3</sub> | <b>d18:0-23:0</b> (638.6446, 620.6340)                                                                                                      | -                                                                                                                                           | -                                                                                                                                           |
| C <sub>42</sub> H <sub>85</sub> NO <sub>3</sub> | <b>d18:0-24:0</b> (652.6603, 634.6497)                                                                                                      | -                                                                                                                                           | -                                                                                                                                           |
| C <sub>43</sub> H <sub>87</sub> NO <sub>3</sub> | d18:0-25:0 (666.6759, 648.6653)                                                                                                             | -                                                                                                                                           | -                                                                                                                                           |
| C <sub>44</sub> H <sub>89</sub> NO <sub>3</sub> | d18:0-26:0 (680.6916, 662.6810)                                                                                                             | -                                                                                                                                           | -                                                                                                                                           |
| <b>1</b>                                        |                                                                                                                                             |                                                                                                                                             |                                                                                                                                             |
| C <sub>32</sub> H <sub>63</sub> NO <sub>3</sub> | d18:0-14:1 (510.4881, 492.4775)                                                                                                             | <b>d18:1-14:0</b> (510.4881, 492.4775)                                                                                                      | -                                                                                                                                           |
| C <sub>33</sub> H <sub>65</sub> NO <sub>3</sub> | <b>d18:0-15:1</b> (524.5038, 506.4932)                                                                                                      | <b>d18:1-15:0</b> (524.5038, 506.4932)                                                                                                      | -                                                                                                                                           |
| C <sub>34</sub> H <sub>67</sub> NO <sub>3</sub> | <b>d18:0-16:1</b> (538.5194, 520.5088)                                                                                                      | <b>d18:1-16:0</b> (538.5194, 520.5088)                                                                                                      | -                                                                                                                                           |
| C <sub>35</sub> H <sub>69</sub> NO <sub>3</sub> | <b>d18:0-17:1</b> (552.5351, 534.5245)                                                                                                      | d18:1-17:0 (552.5351, 534.5245)                                                                                                             | -                                                                                                                                           |
| C <sub>36</sub> H <sub>71</sub> NO <sub>3</sub> | <b>d18:0-18:1</b> (566.5507, 548.5401)                                                                                                      | <b>d18:1-18:0</b> (566.5507, 548.5401)                                                                                                      | -                                                                                                                                           |
| C <sub>37</sub> H <sub>73</sub> NO <sub>3</sub> | <b>d18:0-19:1</b> (580.5664, 562.5558)                                                                                                      | d18:1-19:0 (580.5664, 562.5558)                                                                                                             | -                                                                                                                                           |
| C <sub>38</sub> H <sub>75</sub> NO <sub>3</sub> | <b>d18:0-20:1</b> (594.5820, 576.5714)                                                                                                      | <b>d18:1-20:0</b> (594.5820, 576.5714)                                                                                                      | -                                                                                                                                           |
| C <sub>39</sub> H <sub>77</sub> NO <sub>3</sub> | <b>d18:0-21:1</b> (608.5977, 590.5871)                                                                                                      | <b>d18:1-21:0</b> (608.5977, 590.5871)                                                                                                      | -                                                                                                                                           |
| C <sub>40</sub> H <sub>79</sub> NO <sub>3</sub> | <b>d18:0-22:1</b> (622.6133, 604.6027)                                                                                                      | <b>d18:1-22:0</b> (622.6133, 604.6027)                                                                                                      | -                                                                                                                                           |
| C <sub>41</sub> H <sub>81</sub> NO <sub>3</sub> | <b>d18:0-23:1</b> (636.6290, 618.6184)                                                                                                      | <b>d18:1-23:0</b> (636.6290, 618.6184)                                                                                                      | -                                                                                                                                           |
| C <sub>42</sub> H <sub>83</sub> NO <sub>3</sub> | <b>d18:0-24:1</b> (650.6446, 632.6340)                                                                                                      | <b>d18:1-24:0</b> (650.6446, 632.6340)                                                                                                      | -                                                                                                                                           |

|                                                 |                                        |                                        |                                        |
|-------------------------------------------------|----------------------------------------|----------------------------------------|----------------------------------------|
| C <sub>43</sub> H <sub>85</sub> NO <sub>3</sub> | <b>d18:0-25:1</b> (664.6603, 646.6497) | <b>d18:1-25:0</b> (664.6603, 646.6497) | -                                      |
| C <sub>44</sub> H <sub>87</sub> NO <sub>3</sub> | <b>d18:0-26:1</b> (678.6759, 660.6653) | <b>d18:1-26:0</b> (678.6759, 660.6653) | -                                      |
| <b>2</b>                                        |                                        |                                        |                                        |
| C <sub>32</sub> H <sub>61</sub> NO <sub>3</sub> | d18:0-14:2 (508.4725, 490.4619)        | d18:1-14:1 (508.4725, 490.4619)        | d18:2-14:0 (508.4725, 490.4619)        |
| C <sub>33</sub> H <sub>63</sub> NO <sub>3</sub> | d18:0-15:2 (522.4881, 504.4775)        | d18:1-15:1 (522.4881, 504.4775)        | d18:2-15:0 (522.4881, 504.4775)        |
| C <sub>34</sub> H <sub>65</sub> NO <sub>3</sub> | <b>d18:0-16:2</b> (536.5038, 518.4932) | <b>d18:1-16:1</b> (536.5038, 518.4932) | <b>d18:2-16:0</b> (536.5038, 518.4932) |
| C <sub>35</sub> H <sub>67</sub> NO <sub>3</sub> | d18:0-17:2 (550.5194, 532.5088)        | d18:1-17:1 (550.5194, 532.5088)        | d18:2-17:0 (550.5194, 532.5088)        |
| C <sub>36</sub> H <sub>69</sub> NO <sub>3</sub> | <b>d18:0-18:2</b> (564.5351, 546.5245) | <b>d18:1-18:1</b> (564.5351, 546.5245) | <b>d18:2-18:0</b> (564.5351, 546.5245) |
| C <sub>37</sub> H <sub>71</sub> NO <sub>3</sub> | d18:0-19:2 (578.5507, 560.5401)        | d18:1-19:1 (578.5507, 560.5401)        | d18:2-19:0 (578.5507, 560.5401)        |
| C <sub>38</sub> H <sub>73</sub> NO <sub>3</sub> | <b>d18:0-20:2</b> (592.5664, 574.5558) | <b>d18:1-20:1</b> (592.5664, 574.5558) | <b>d18:2-20:0</b> (592.5664, 574.5558) |
| C <sub>39</sub> H <sub>75</sub> NO <sub>3</sub> | d18:0-21:2 (606.5820, 588.5714)        | d18:1-21:1 (606.5820, 588.5714)        | d18:2-21:0 (606.5820, 588.5714)        |
| C <sub>40</sub> H <sub>77</sub> NO <sub>3</sub> | d18:0-22:2 (620.5977, 602.5871)        | <b>d18:1-22:1</b> (620.5977, 602.5871) | <b>d18:2-22:0</b> (620.5977, 602.5871) |
| C <sub>41</sub> H <sub>79</sub> NO <sub>3</sub> | d18:0-23:2 (634.6133, 616.6027)        | <b>d18:1-23:1</b> (634.6133, 616.6027) | <b>d18:2-23:0</b> (634.6133, 616.6027) |
| C <sub>42</sub> H <sub>81</sub> NO <sub>3</sub> | d18:0-24:2 (648.6290, 630.6184)        | <b>d18:1-24:1</b> (648.6290, 630.6184) | d18:2-24:0 (648.6290, 630.6184)        |
| C <sub>43</sub> H <sub>83</sub> NO <sub>3</sub> | <b>d18:0-25:2</b> (662.6446, 644.6340) | <b>d18:1-25:1</b> (662.6446, 644.6340) | <b>d18:2-25:0</b> (662.6446, 644.6340) |
| C <sub>44</sub> H <sub>85</sub> NO <sub>3</sub> | <b>d18:0-26:2</b> (676.6603, 658.6497) | <b>d18:1-26:1</b> (676.6603, 658.6497) | <b>d18:2-26:0</b> (676.6603, 658.6497) |
| <b>3</b>                                        |                                        |                                        |                                        |
| C <sub>42</sub> H <sub>79</sub> NO <sub>3</sub> | d18:0-24:3 (646.6133, 628.6027)        | <b>d18:1-24:2</b> (646.6133, 628.6027) | <b>d18:2-24:1</b> (646.6133, 628.6027) |
| C <sub>43</sub> H <sub>81</sub> NO <sub>3</sub> | d18:0-25:3 (660.6290, 642.6184)        | <b>d18:1-25:2</b> (660.6290, 642.6184) | <b>d18:2-25:1</b> (660.6290, 642.6184) |
| C <sub>44</sub> H <sub>83</sub> NO <sub>3</sub> | <b>d18:0-26:3</b> (674.6446, 656.6340) | <b>d18:1-26:2</b> (674.6446, 656.6340) | d18:2-26:1 (674.6446, 656.6340)        |
| <b>4</b>                                        |                                        |                                        |                                        |
| C <sub>44</sub> H <sub>81</sub> NO <sub>3</sub> | <b>d18:0-26:4</b> (672.6290, 654.6184) | <b>d18:1-26:3</b> (672.6290, 654.6184) | <b>d18:2-26:2</b> (672.6290, 654.6184) |

**Table S3: Glucose, fatty acid, and protein oxidation rates and total energy expenditures in low (LBW) and normal birth weight (NBW) men during the control (C) and high-fat, high-calorie (O) diets.** Data are presented as mean values  $\pm$  standard errors of means (SEM). P-values are presented unadjusted for multiple comparisons, and P-values  $\leq 0.05$  are considered statistically significant.  $P_{NBW}$  and  $P_{LBW}$ : O vs. C diet within each birth weight group,  $P_C$  and  $P_O$ : LBW vs. NBW men within each diet,  $P_{\Delta}$ : LBW vs. NBW men on response values. P-values  $\leq 0.05$  are marked in bold. Day: 9 am-11 pm, Night: 11 pm-8 am, Sleep: 1 am-6 am, 24 hours: 9 am-9 am. Abbreviations: EE: Energy expenditure, FOX: Fatty acid oxidation, GOX: Glucose oxidation, POX: Protein oxidation.

|                         | NBW<br>(n = 26)       |                       |                   | LBW<br>(C: n = 20, O: n = 18) |                       |                   | LBW vs. NBW<br>(n = 20/n = 18, n = 26) |       |              |
|-------------------------|-----------------------|-----------------------|-------------------|-------------------------------|-----------------------|-------------------|----------------------------------------|-------|--------------|
|                         | C<br>(Mean $\pm$ SEM) | O<br>(Mean $\pm$ SEM) | $P_{NBW}$         | C<br>(Mean $\pm$ SEM)         | O<br>(Mean $\pm$ SEM) | $P_{LBW}$         | $P_C$                                  | $P_O$ | $P_{\Delta}$ |
| <b>Calorimetry 24 h</b> |                       |                       |                   |                               |                       |                   |                                        |       |              |
| <b>GOX</b>              |                       |                       |                   |                               |                       |                   |                                        |       |              |
| Day                     | 3.85 $\pm$ 0.17       | 3.50 $\pm$ 0.08       | <b>0.0297</b>     | 3.69 $\pm$ 0.16               | 3.30 $\pm$ 0.14       | 0.0609            | 0.52                                   | 0.19  | 0.94         |
| Night                   | 1.97 $\pm$ 0.10       | 2.07 $\pm$ 0.07       | 0.3126            | 1.78 $\pm$ 0.09               | 1.84 $\pm$ 0.10       | 0.3391            | 0.18                                   | 0.06  | 0.97         |
| Sleep                   | 1.91 $\pm$ 0.12       | 1.89 $\pm$ 0.08       | 0.9131            | 1.58 $\pm$ 0.10               | 1.77 $\pm$ 0.11       | 0.0836            | <b>0.05</b>                            | 0.37  | 0.21         |
| 24 h                    | 3.10 $\pm$ 0.13       | 2.93 $\pm$ 0.07       | 0.1510            | 2.92 $\pm$ 0.13               | 2.73 $\pm$ 0.09       | 0.2620            | 0.34                                   | 0.09  | 0.97         |
| <b>FOX</b>              |                       |                       |                   |                               |                       |                   |                                        |       |              |
| Day                     | 3.34 $\pm$ 0.16       | 4.23 $\pm$ 0.14       | <b>&lt;0.0001</b> | 3.46 $\pm$ 0.14               | 4.52 $\pm$ 0.21       | <b>&lt;0.0001</b> | 0.60                                   | 0.23  | 0.60         |
| Night                   | 2.34 $\pm$ 0.10       | 2.80 $\pm$ 0.10       | <b>0.0005</b>     | 2.60 $\pm$ 0.08               | 3.06 $\pm$ 0.12       | <b>0.0023</b>     | 0.07                                   | 0.10  | 0.93         |
| Sleep                   | 2.14 $\pm$ 0.14       | 2.72 $\pm$ 0.12       | <b>0.0001</b>     | 2.50 $\pm$ 0.09               | 2.87 $\pm$ 0.13       | <b>0.0221</b>     | <b>0.05</b>                            | 0.38  | 0.40         |
| 24 h                    | 2.92 $\pm$ 0.12       | 3.63 $\pm$ 0.12       | <b>&lt;0.0001</b> | 3.11 $\pm$ 0.11               | 3.91 $\pm$ 0.14       | <b>&lt;0.0001</b> | 0.24                                   | 0.14  | 0.76         |
| <b>POX</b>              |                       |                       |                   |                               |                       |                   |                                        |       |              |
| Day                     | 1.13 $\pm$ 0.04       | 0.79 $\pm$ 0.03       | <b>&lt;0.0001</b> | 1.08 $\pm$ 0.04               | 0.74 $\pm$ 0.04       | <b>&lt;0.0001</b> | 0.48                                   | 0.32  | 0.71         |
| Night                   | 1.13 $\pm$ 0.04       | 0.79 $\pm$ 0.03       | <b>&lt;0.0001</b> | 1.08 $\pm$ 0.04               | 0.74 $\pm$ 0.04       | <b>&lt;0.0001</b> | 0.48                                   | 0.32  | 0.71         |
| Sleep                   | 1.13 $\pm$ 0.04       | 0.79 $\pm$ 0.03       | <b>&lt;0.0001</b> | 1.08 $\pm$ 0.04               | 0.74 $\pm$ 0.04       | <b>&lt;0.0001</b> | 0.48                                   | 0.32  | 0.71         |
| 24 h                    | 1.13 $\pm$ 0.04       | 0.79 $\pm$ 0.03       | <b>&lt;0.0001</b> | 1.08 $\pm$ 0.04               | 0.74 $\pm$ 0.04       | <b>&lt;0.0001</b> | 0.48                                   | 0.32  | 0.71         |
| <b>EE</b>               |                       |                       |                   |                               |                       |                   |                                        |       |              |
| Day                     | 8.32 $\pm$ 0.15       | 8.52 $\pm$ 0.13       | <b>0.0142</b>     | 8.24 $\pm$ 0.16               | 8.56 $\pm$ 0.18       | <b>0.0021</b>     | 0.71                                   | 0.86  | 0.39         |
| Night                   | 5.43 $\pm$ 0.09       | 5.65 $\pm$ 0.10       | <b>0.0001</b>     | 5.46 $\pm$ 0.11               | 5.66 $\pm$ 0.13       | <b>0.0017</b>     | 0.82                                   | 0.97  | 0.99         |
| Sleep                   | 5.17 $\pm$ 0.09       | 5.39 $\pm$ 0.09       | <b>0.0010</b>     | 5.16 $\pm$ 0.11               | 5.30 $\pm$ 0.13       | <b>0.0009</b>     | 0.96                                   | 0.93  | 0.82         |
| 24 h                    | 7.14 $\pm$ 0.12       | 7.36 $\pm$ 0.12       | <b>0.0005</b>     | 7.12 $\pm$ 0.14               | 7.38 $\pm$ 0.15       | <b>0.0008</b>     | 0.88                                   | 0.90  | 0.55         |

**Table S4: Associations between plasma ceramide levels and other lipid levels or physiological measures following the control (C) and high-fat, high-calorie (O) diets and between response values (Δ).** Data are presented as r-values (+/- for positive or negative values, respectively) and P-values (+/-: P≤0.05, + +/- -: P≤0.01, + + +/- - -: P≤0.001, (+)/(-): P≤0.1 for positive or negative associations, respectively). P-values are presented unadjusted for multiple comparisons, and P-values ≤0.05 are considered statistically significant. Regression analyses were performed on the pooled data set of LBW and NBW men and were adjusted for age, BMI, and birth weight group. Abbreviations: See Table 1.

|                        |   | d18:0-16:1/d18:1-16:0 | d18:0-18:1/d18:1-18:0 | d18:0-20:1/d18:1-20:0 | d18:0-21:1/d18:1-21:0 | d18:1-22:0 | d18:0-23:1/d18:1-23:0 | d18:0-24:1a | d18:1-24:0 | d18:0-25:1 b/d18:1-25:0 | d18:0-26:1/d18:1-26:0 | d18:1-22:1/d18:2-22:0 | d18:1-23:1/d18:2-23:0 | d18:1-24:1 | d18:0-25:2/d18:1-25:1/d18:2-25:0 | d18:1-24:2/d18:2-24:1 | Total ceramide |
|------------------------|---|-----------------------|-----------------------|-----------------------|-----------------------|------------|-----------------------|-------------|------------|-------------------------|-----------------------|-----------------------|-----------------------|------------|----------------------------------|-----------------------|----------------|
| <b>Lipid profiling</b> |   |                       |                       |                       |                       |            |                       |             |            |                         |                       |                       |                       |            |                                  |                       |                |
| P-VLDL-CHOL            | C | +                     | ++                    |                       | +                     | ++         | ++                    | (+)         | +          |                         | (+)                   |                       | +                     | ++         |                                  | +++                   | ++             |
|                        | O |                       |                       |                       |                       |            |                       |             |            | ++                      | (+)                   |                       |                       | ++         |                                  | +++                   | +              |
|                        | Δ |                       |                       |                       |                       |            |                       |             |            |                         |                       |                       |                       |            |                                  |                       |                |
| P-LDL-CHOL             | C | +++                   |                       |                       |                       | ++         | +                     | +++         |            |                         |                       |                       |                       | ++         | +                                | +++                   | ++             |
|                        | O |                       | +++                   | +                     | +                     | +++        | +++                   | +           | +++        | +++                     | +++                   | ++                    | +                     | ++         | +                                | ++                    | +++            |
|                        | Δ |                       | (+)                   |                       |                       | (+)        | (+)                   | (+)         | +          |                         | +                     |                       |                       |            |                                  | (+)                   |                |
| P-HDL-CHOL             | C |                       |                       |                       |                       |            |                       |             |            |                         |                       |                       |                       |            |                                  |                       |                |
|                        | O |                       |                       |                       |                       |            |                       |             |            |                         |                       |                       |                       |            | (-)                              |                       |                |
|                        | Δ | +                     |                       | (+)                   |                       | +          | +                     |             | +          | ++                      | (+)                   |                       |                       | ++         |                                  |                       | +              |
| P-CHOL                 | C | +++                   |                       |                       |                       | +++        | ++                    | ++          |            |                         |                       |                       |                       | ++         | (+)                              | +++                   | ++             |
|                        | O |                       | +++                   | ++                    | ++                    | +++        | +++                   | +           | +++        | +++                     | +++                   | ++                    | ++                    | +++        | +                                | +++                   | +++            |
|                        | Δ | (+)                   | (+)                   |                       |                       | +          | +                     | (+)         | +          |                         | +                     |                       |                       | +          |                                  | +                     | (+)            |
| P-TG                   | C | +                     | +++                   |                       | +                     | ++         | ++                    |             | (+)        |                         | +                     |                       | +                     | ++         |                                  | +++                   | ++             |
|                        | O |                       | ++                    | ++                    | +++                   | ++         | ++                    | (+)         | ++         | ++                      | +                     | +++                   | +                     | +++        | (+)                              | +++                   | ++             |
|                        | Δ |                       |                       |                       |                       |            |                       |             |            |                         |                       |                       |                       |            |                                  |                       |                |
| <b>Clamp</b>           |   |                       |                       |                       |                       |            |                       |             |            |                         |                       |                       |                       |            |                                  |                       |                |
| <i>Basal</i>           |   |                       |                       |                       |                       |            |                       |             |            |                         |                       |                       |                       |            |                                  |                       |                |
| B-Glucose              | C | +                     | ++                    |                       |                       | (+)        |                       | +           |            |                         | ++                    |                       |                       | ++         |                                  | +                     | +              |
|                        | O |                       |                       |                       |                       |            |                       |             |            |                         |                       |                       |                       | (+)        |                                  |                       |                |
|                        | Δ |                       |                       |                       |                       |            |                       |             |            | +                       |                       |                       |                       |            |                                  |                       |                |
| S-Insulin              | C |                       |                       |                       |                       | +          | (+)                   |             |            |                         | (+)                   |                       |                       |            |                                  |                       |                |
|                        | O |                       |                       |                       |                       |            |                       |             |            |                         |                       |                       |                       |            |                                  |                       |                |
|                        | Δ | (+)                   |                       |                       |                       |            |                       |             |            |                         |                       |                       |                       |            |                                  |                       |                |
| P-NEFA                 | C |                       | (-)                   |                       | -                     |            |                       |             |            |                         |                       |                       | -                     | (-)        |                                  | (-)                   |                |

|                           |          |     |     |     |     |     |     |  |     |     |  |     |  |  |  |   |     |     |     |     |
|---------------------------|----------|-----|-----|-----|-----|-----|-----|--|-----|-----|--|-----|--|--|--|---|-----|-----|-----|-----|
|                           | <b>O</b> |     |     |     |     |     |     |  |     |     |  |     |  |  |  |   | +   |     | ++  |     |
|                           | <b>Δ</b> |     |     |     | (+) |     |     |  |     |     |  | (+) |  |  |  |   |     |     |     |     |
| HGP                       | <b>C</b> |     | +   |     |     |     |     |  | +++ |     |  | +   |  |  |  |   |     | (+) | (+) |     |
|                           | <b>O</b> |     |     |     |     |     |     |  |     |     |  |     |  |  |  |   |     |     |     |     |
|                           | <b>Δ</b> |     |     |     |     |     |     |  |     |     |  |     |  |  |  |   |     |     |     |     |
| Hepatic IR                | <b>C</b> |     |     | (+) |     | +   | (+) |  | (+) |     |  |     |  |  |  |   | (+) | (+) |     | +   |
|                           | <b>O</b> | (+) |     |     |     |     |     |  |     |     |  |     |  |  |  |   |     |     |     |     |
|                           | <b>Δ</b> |     |     |     |     |     |     |  |     |     |  |     |  |  |  |   |     | (+) |     |     |
| GOX                       | <b>C</b> |     | -   |     |     |     |     |  |     |     |  |     |  |  |  |   |     |     |     |     |
|                           | <b>O</b> |     |     |     |     | (+) |     |  |     |     |  |     |  |  |  |   |     |     |     |     |
|                           | <b>Δ</b> |     | -   | (-) |     |     |     |  |     |     |  |     |  |  |  |   |     |     | -   |     |
| FOX                       | <b>C</b> | +   | +   | +   |     | +   | (+) |  | +   |     |  | (+) |  |  |  |   | (+) |     | +   | +   |
|                           | <b>O</b> |     | (+) |     |     |     |     |  |     |     |  |     |  |  |  |   |     |     | +   |     |
|                           | <b>Δ</b> | (+) | (+) |     |     |     |     |  |     |     |  |     |  |  |  |   | (+) |     | (+) |     |
| <i>Insulin-stimulated</i> |          |     |     |     |     |     |     |  |     |     |  |     |  |  |  |   |     |     |     |     |
| M-value                   | <b>C</b> | +   |     |     |     |     |     |  |     |     |  |     |  |  |  |   |     |     |     |     |
|                           | <b>O</b> |     |     |     |     |     |     |  |     |     |  |     |  |  |  |   |     |     |     |     |
|                           | <b>Δ</b> |     | (+) |     |     |     |     |  | (+) |     |  | +   |  |  |  | + |     |     |     | +   |
| <b>IVGTT</b>              |          |     |     |     |     |     |     |  |     |     |  |     |  |  |  |   |     |     |     |     |
| FPIR                      | <b>C</b> |     |     |     |     |     |     |  |     |     |  |     |  |  |  |   |     |     |     |     |
|                           | <b>O</b> |     |     |     |     |     |     |  |     |     |  |     |  |  |  |   |     |     | (-) |     |
|                           | <b>Δ</b> |     |     |     | (-) |     |     |  |     |     |  |     |  |  |  |   |     |     |     |     |
| Hepatic DI                | <b>C</b> |     |     |     |     |     |     |  | -   |     |  |     |  |  |  |   |     |     |     |     |
|                           | <b>O</b> |     |     | (-) |     |     |     |  |     |     |  | -   |  |  |  |   | -   |     | (-) |     |
|                           | <b>Δ</b> |     |     |     |     |     |     |  |     |     |  |     |  |  |  |   |     | (-) |     |     |
| Peripheral DI             | <b>C</b> |     |     |     |     |     |     |  |     |     |  |     |  |  |  |   |     |     |     |     |
|                           | <b>O</b> |     | (-) |     |     |     |     |  | (-) | (-) |  |     |  |  |  |   |     |     |     | (-) |
|                           | <b>Δ</b> |     |     |     |     |     |     |  |     |     |  |     |  |  |  |   |     |     |     |     |
